# Supplementary material for: Prediction of Overall Disease Burden in (y)pN1 Breast Cancer Using Knowledge-Based Machine Learning Model
Source: MDPI journal article supplement (doi:10.3390/cancers16081494), 2024-04-13
Supplement: s1 [file s1]

|                                       | Control group       |        | Experimental group     |        |
|---------------------------------------|---------------------|--------|------------------------|--------|
|                                       | (PMRT or WBI + RNI) |        | (no PMRT or WBI alone) |        |
|                                       | Mean                | SD     | Mean                   | SD     |
| <b>7-year DFS rate</b>                |                     |        |                        |        |
| Recurrent                             | 18.80%              | 23.90% | 19.40%                 | 22.80% |
| Disease-free                          | 81.20%              | 23.90% | 80.60%                 | 22.80% |
| <b>Likelihood of being healthy</b>    |                     |        |                        |        |
| Unhealthy                             | 25.40%              | 10.00% | 25.40%                 | 9.50%  |
| Healthy                               | 74.60%              | 10.00% | 74.60%                 | 9.50%  |
| <b>Clinical lymphedema</b>            |                     |        |                        |        |
| None                                  | 84.60%              | 6.90%  | 84.90%                 | 6.60%  |
| Lymphedema                            | 15.40%              | 6.90%  | 15.10%                 | 6.60%  |
| <b>Dermatitis</b>                     |                     |        |                        |        |
| None or grade 1                       | 80.70%              | 14.20% | 80.70%                 | 14.20% |
| Grade $\geq$ 2                        | 19.30%              | 14.20% | 19.30%                 | 14.20% |
| <b><i>In situ</i>/invasive cancer</b> |                     |        |                        |        |
| None                                  | 93.30%              | 5.40%  | 93.40%                 | 5.20%  |
| Contralateral event                   | 6.70%               | 5.40%  | 6.60%                  | 5.20%  |
| <b>Major cardiac events</b>           |                     |        |                        |        |
| None                                  | 92.40%              | 7.20%  | 92.60%                 | 6.80%  |
| Major cardiac event                   | 7.60%               | 7.20%  | 7.40%                  | 6.80%  |
| <b>Reconstruction failure</b>         |                     |        |                        |        |
| None                                  | 99.00%              | 0.60%  | 99.40%                 | 0.40%  |
| Major failure event                   | 1.00%               | 0.60%  | 0.60%                  | 0.40%  |
| <b>Rib fracture</b>                   |                     |        |                        |        |
| None                                  | 90.60%              | 11.70% | 90.60%                 | 11.70% |
| Clinical/radiological fracture        | 9.40%               | 11.70% | 9.40%                  | 11.70% |
| <b>Symptomatic pneumonitis</b>        |                     |        |                        |        |
| None                                  | 90.40%              | 8.70%  | 90.40%                 | 8.70%  |
| Symptomatic pneumonitis               | 9.60%               | 8.70%  | 9.60%                  | 8.70%  |

**Supplementary Table S1.** Sensitivity analysis for the two arms of the PORT-N1 clinical trial.

Abbreviations: DFS, disease-free survival; PMRT, post-mastectomy radiotherapy; RNI, regional nodal irradiation; SD, standard deviation; WBI, whole-breast irradiation.

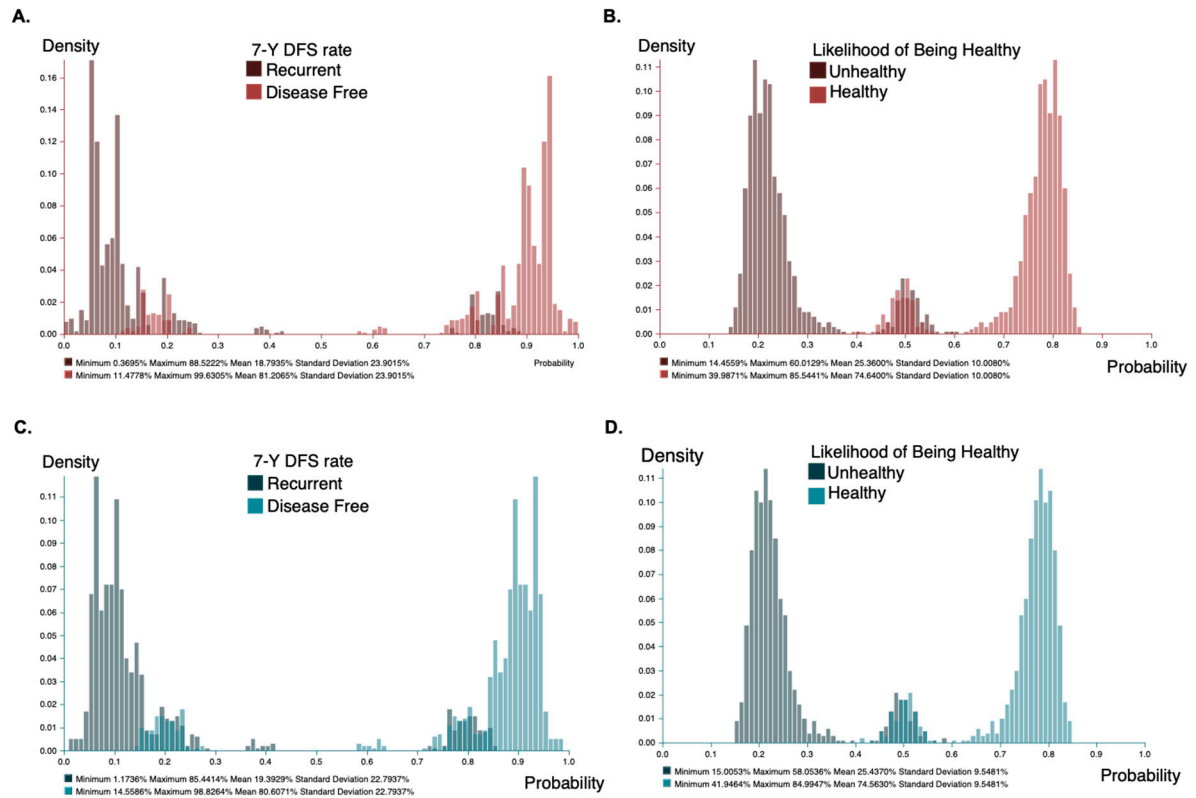

**Supplementary Figure S1. Density Plots for the Probabilities between Two Arms of the PORT-N1 Clinical Trial.** For the control group of the PORT-N1 trial, probability density of **(A)** 7-Year Disease Free Survival (DFS) and **(B)** likelihood of being healthy are plotted. For the experimental group, those of **(C)** 7-Y DFS and **(D)** likelihood of being healthy are plotted.
